# Supplementary material for: Using Zebrafish to Dissect the Interaction of Mycobacteria with the Autophagic Machinery in Macrophages
Source: Biology (Basel). 2023 Jun 4;12(6):817. doi: 10.3390/biology12060817 (PMC10295493; doi:10.3390/biology12060817)
Supplement: Supplementary file 1 [file biology-12-00817-s001.zip]

Archive with 8 entries (8 files):
- Supplementary Figure 1.pdf
- Video S1-Fig-1a.avi
- Video S2-Fig-1b.avi
- Video S3-Fig-2.avi
- Video S4-Fig-3.avi
- Video S5-Fig-4a.avi
- Video-S6-Fig-4b.avi
- Video-S7-Fig-5.avi
